# Supplementary material for: Flavonoids from Fig (Ficus carica Linn.) Leaves: The Development of a New Extraction Method and Identification by UPLC-QTOF-MS/MS
Source: MDPI journal article supplement (doi:10.3390/app11167718), 2021-08-22
Supplement: s1 [file s1]

**Flavonoids from Fig (*Ficus carica* Linn.) leaves: the  
development of new extraction method and identification by UPLC-  
QTOF-MS/MS**

**Supplementary Materials: supplementary figures**

**Chunjian Zhao <sup>a,b,d,e</sup>, Shen Li <sup>a,b</sup>, Chunying Li <sup>a,b,c,\*</sup>, Tingting Wang <sup>a,b</sup>, Yao Tian <sup>a,b</sup>, Xin Li <sup>a,b</sup>, Yujie Fu <sup>a,b,d,e,\*</sup>**

<sup>a</sup> Key Laboratory of Forest Plant Ecology, Ministry of Education, Northeast Forestry University, Harbin 150040, PR China

<sup>b</sup> College of Chemical Engineering and Resource Utilization, Northeast Forestry University, Harbin 150040, PR China

<sup>c</sup> State Engineering Laboratory for Bio-Resource Eco-Utilization, Northeast Forestry University, Harbin 150040, PR China

<sup>d</sup> Collaborative Innovation Center for Development and Utilization of Forest Resources, Harbin 150040, PR China

<sup>e</sup> Engineering Research Center of Forest Bio-preparation, Ministry of Education, Northeast Forestry University, 150040 Harbin, PR China

\* Correspondence: nefujane@aliyun.com (C.Li); Tel./Fax: +86-451-8219-0848

## FIGURES

a Spectrum from SA-NEG.wiff (sample 1) - Sample001, Experiment 1, -TOF MS (100 - 2000) from 10.349 min

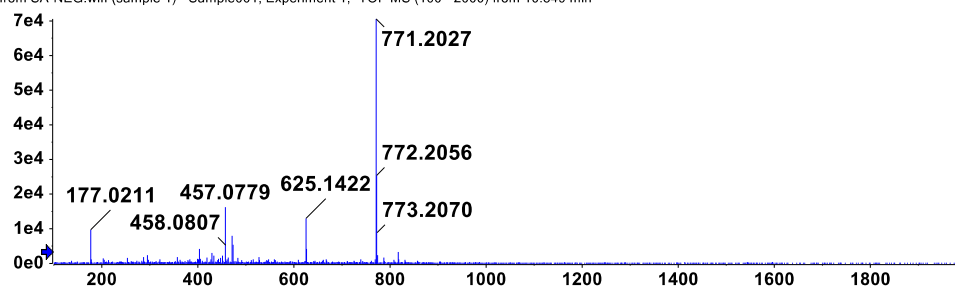

b Spectrum from SA-NEG.wiff (sample 1) - Sample001, Experiment 9, -TOF MS<sup>2</sup> (50 - 1500) from 10.360 min  
Precursor: 771.2 Da

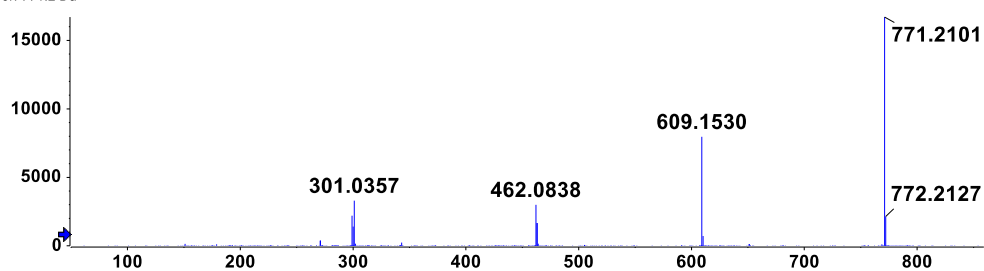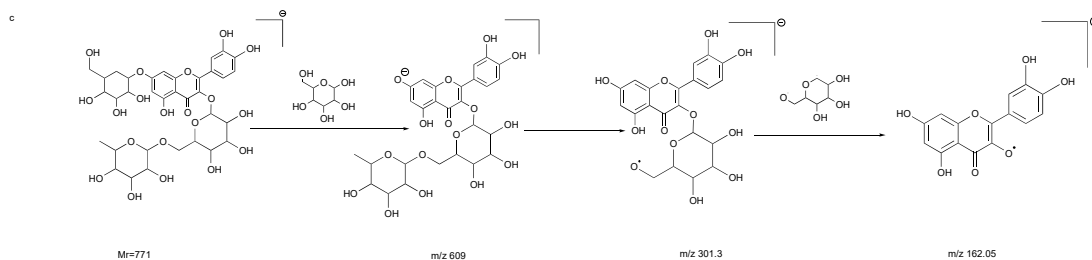

**Fig.S1.** The first order mass spectrometry (a), the secondary mass spectrometry (b) and the cleavage pathway (c) of compound 1.

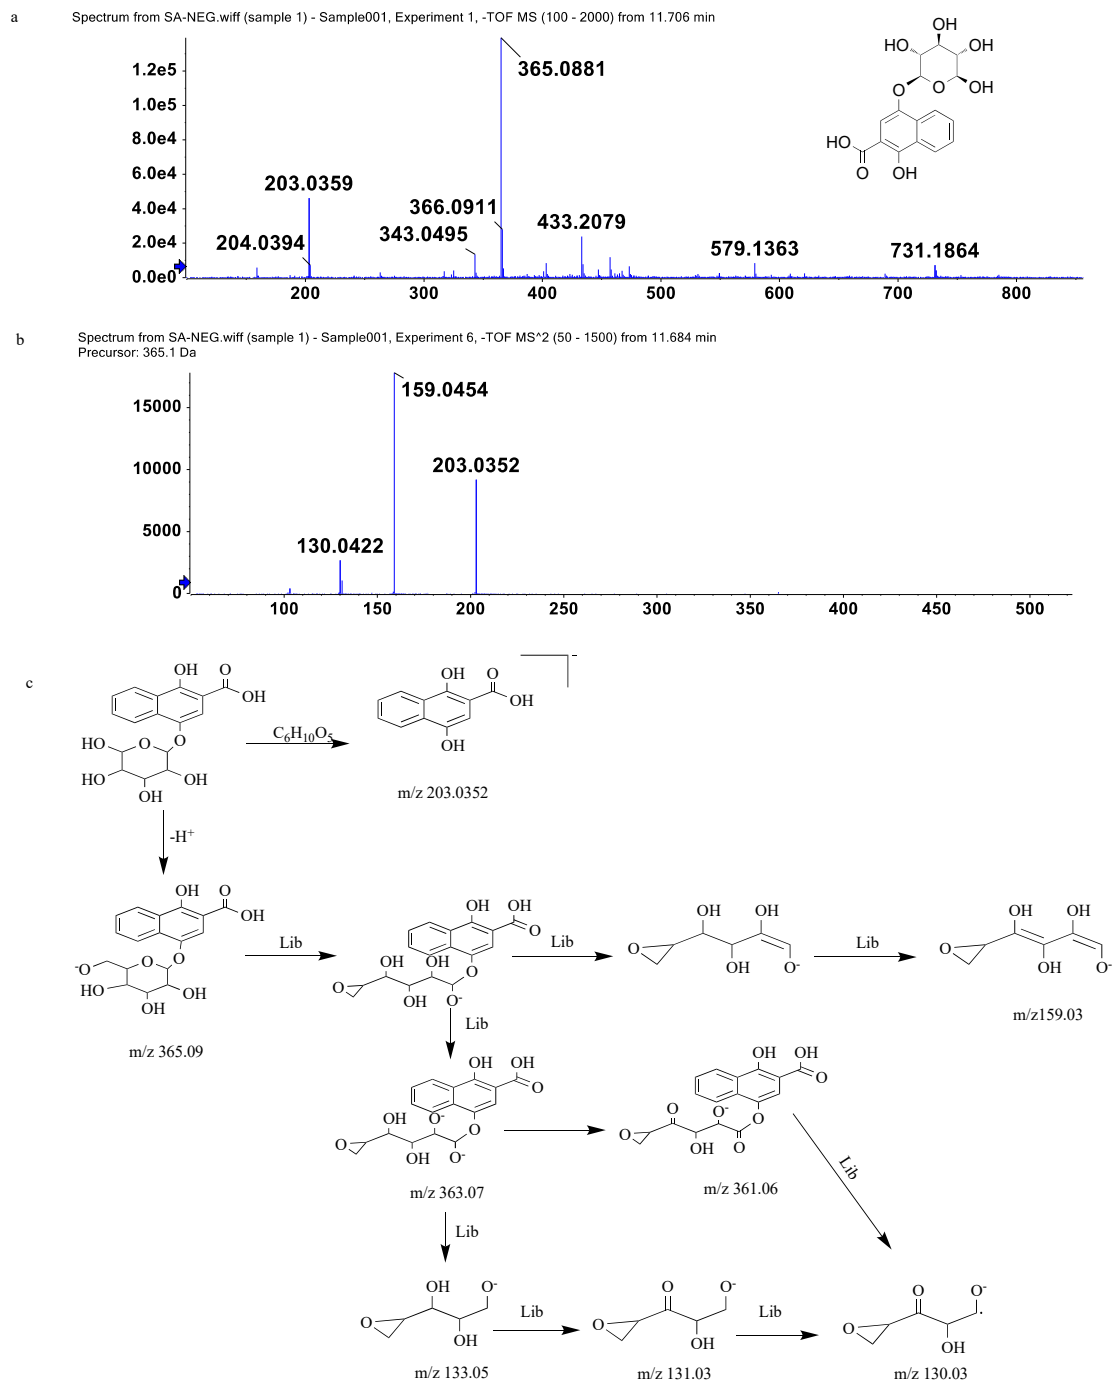

**Fig.S2.** The first order mass spectrometry (a), the secondary mass spectrometry (b) and the cleavage pathway (c) of compound 2.

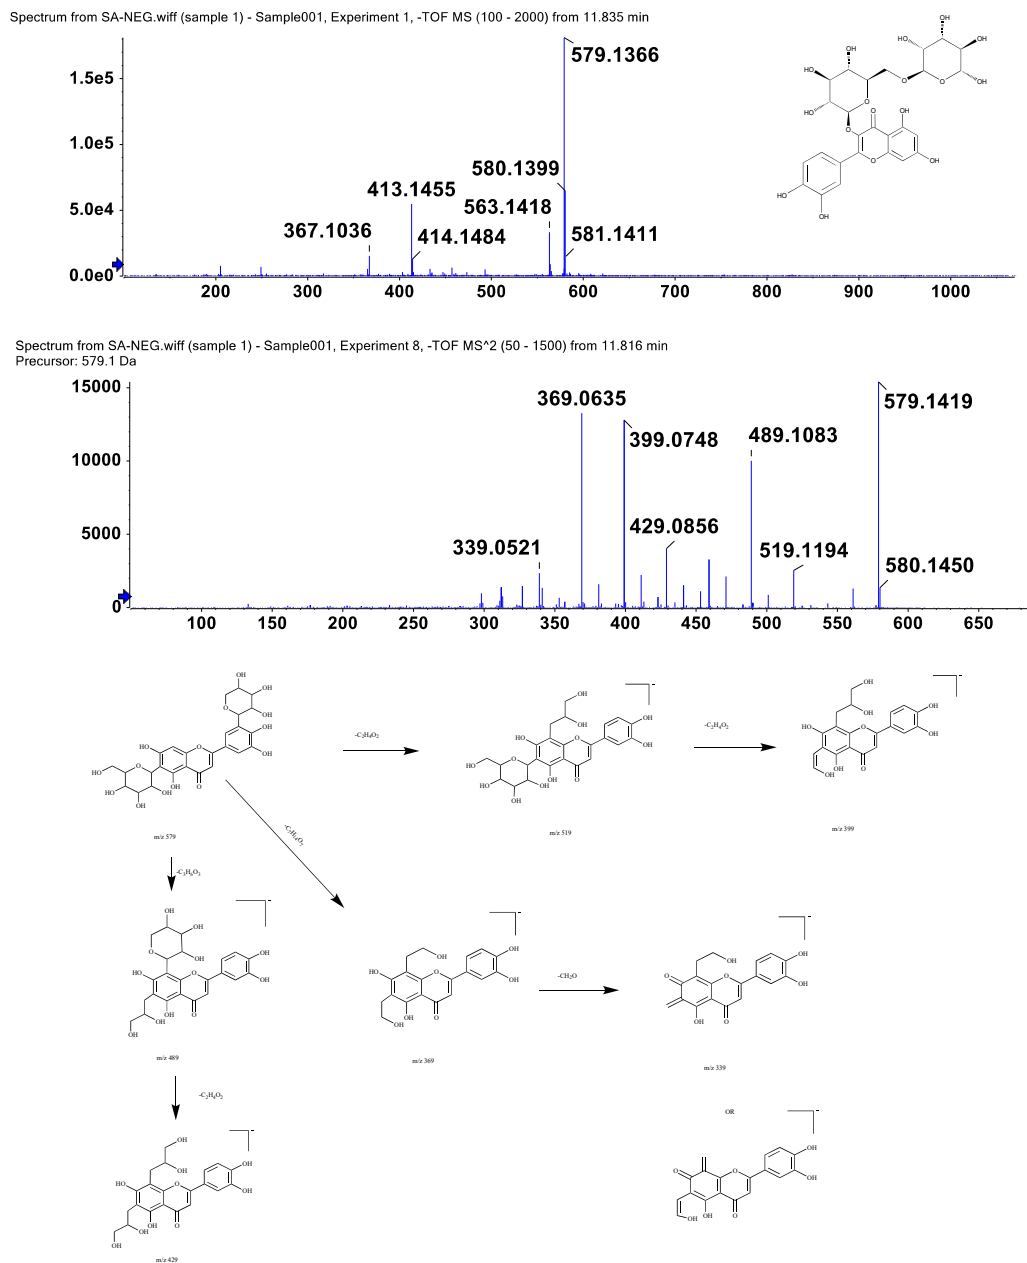

**Fig.S3.** The first order mass spectrometry (a), the secondary mass spectrometry (b) and the cleavage pathway (c) of compound 3.

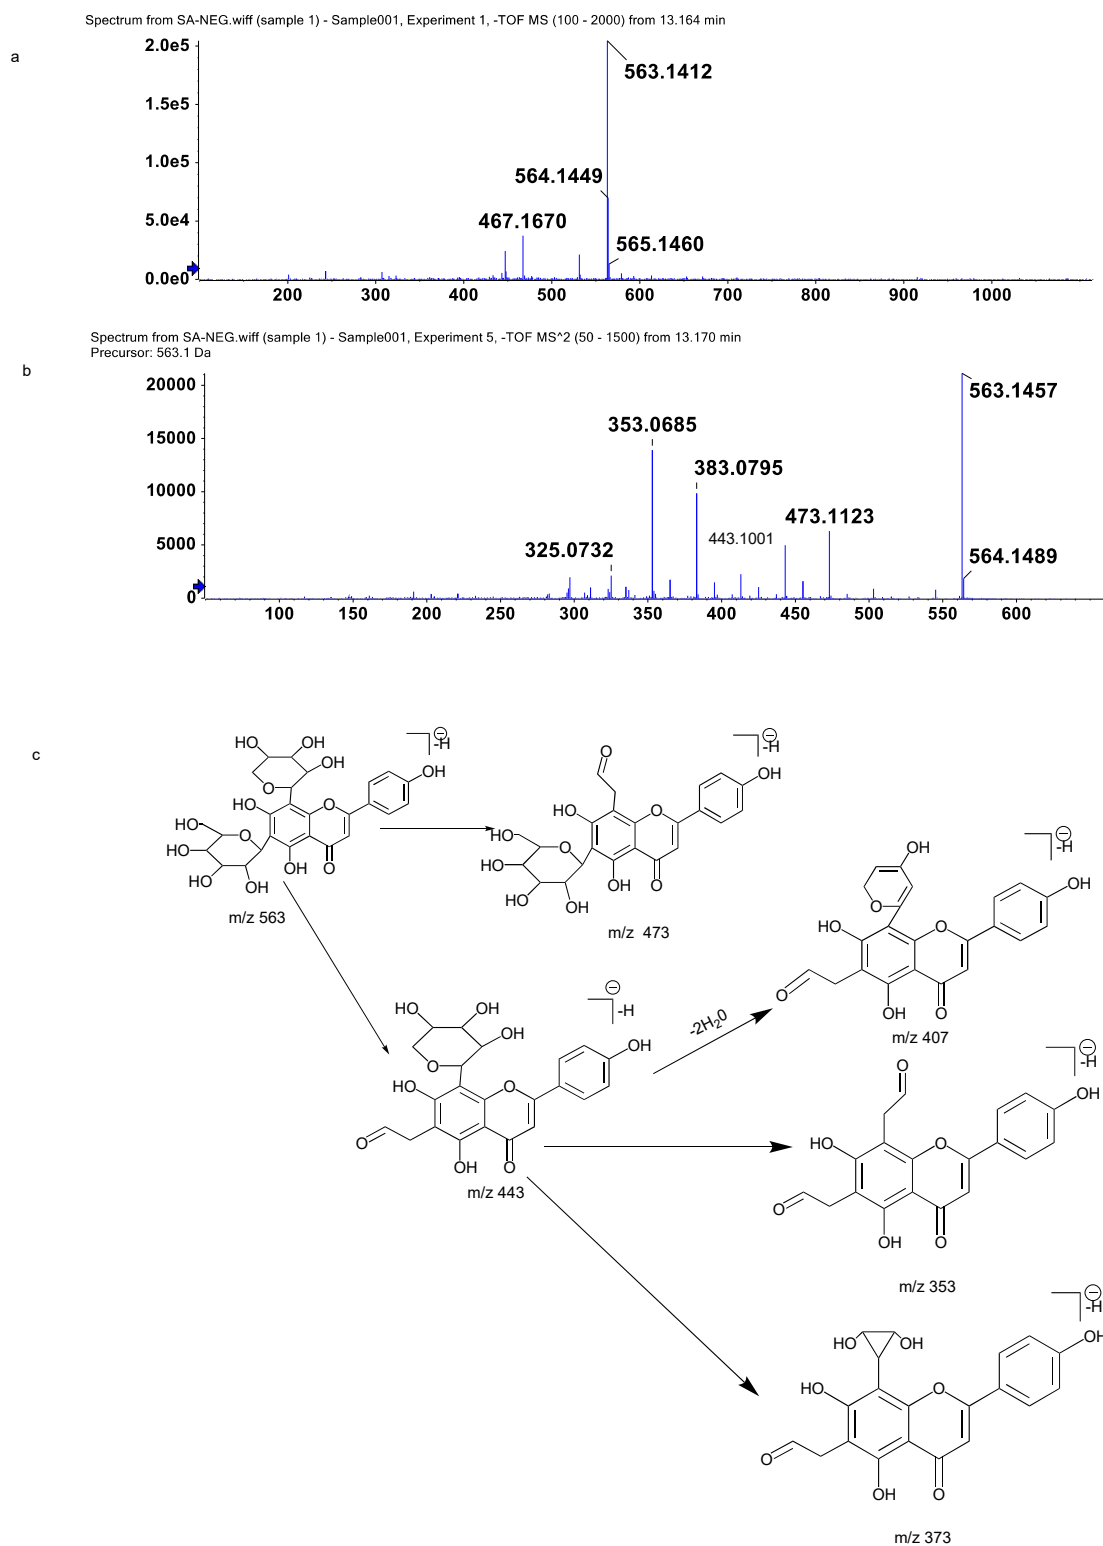

**Fig.S4.** The first order mass spectrometry (a), the secondary mass spectrometry (b) and the cleavage pathway (c) of compound 4.

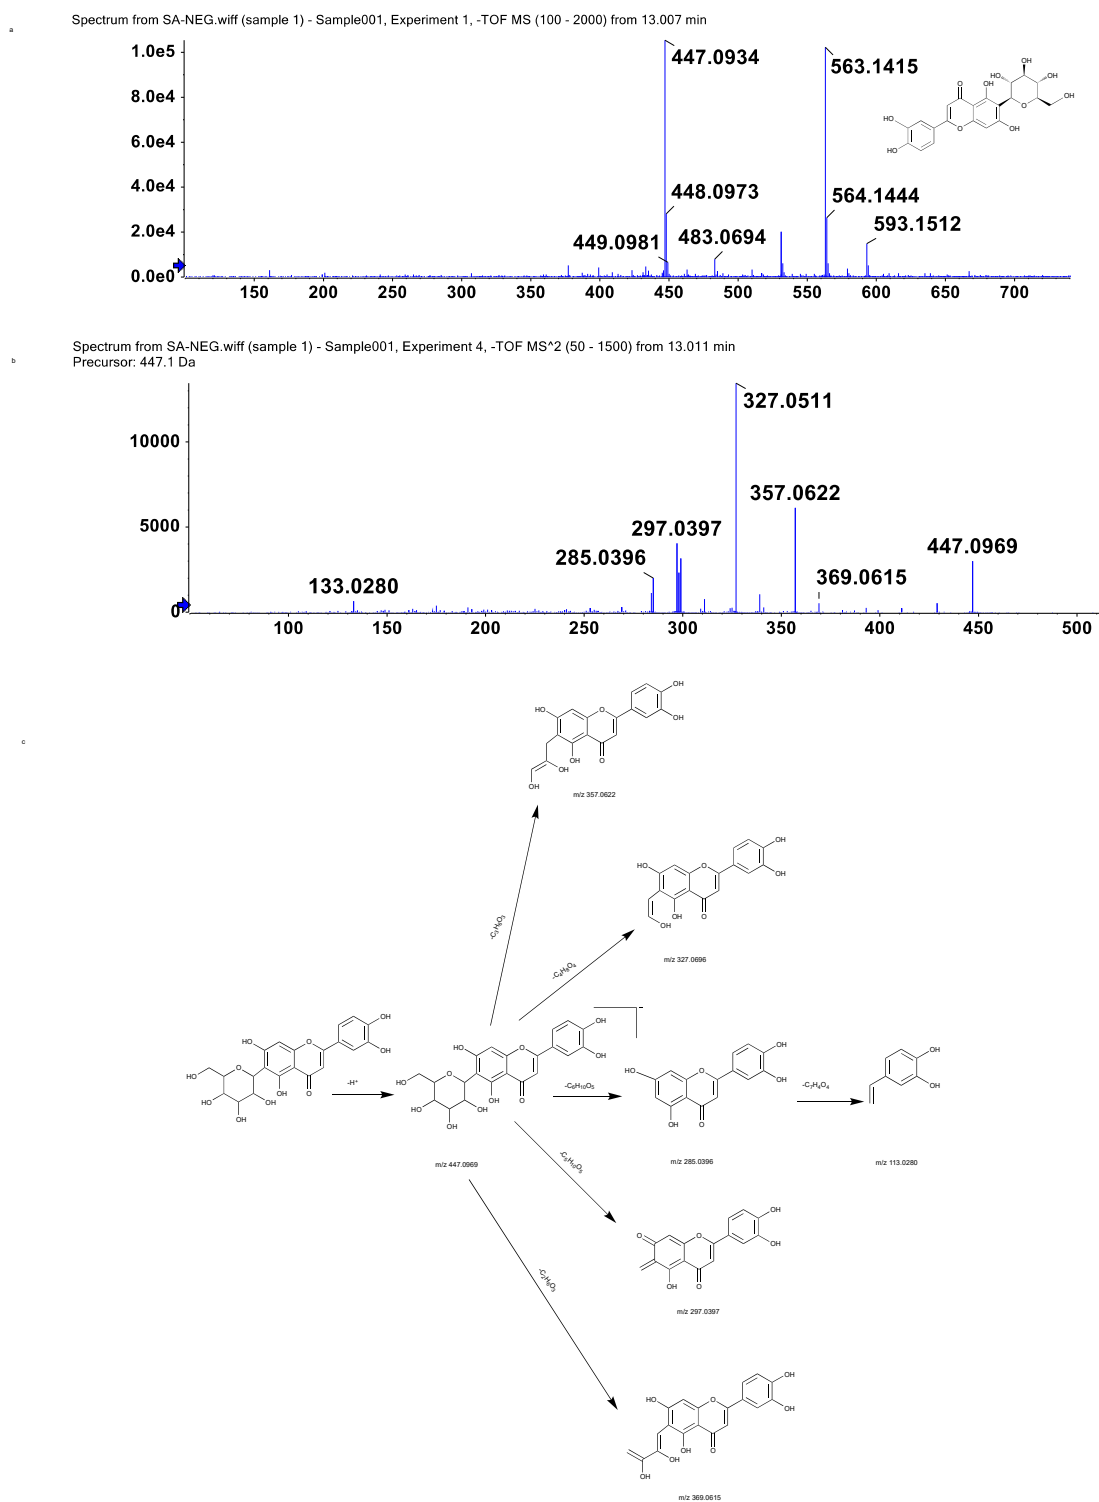

Fig.S5. The first order mass spectrometry (a), the secondary mass spectrometry (b) and the cleavage pathway (c) of compound 5.

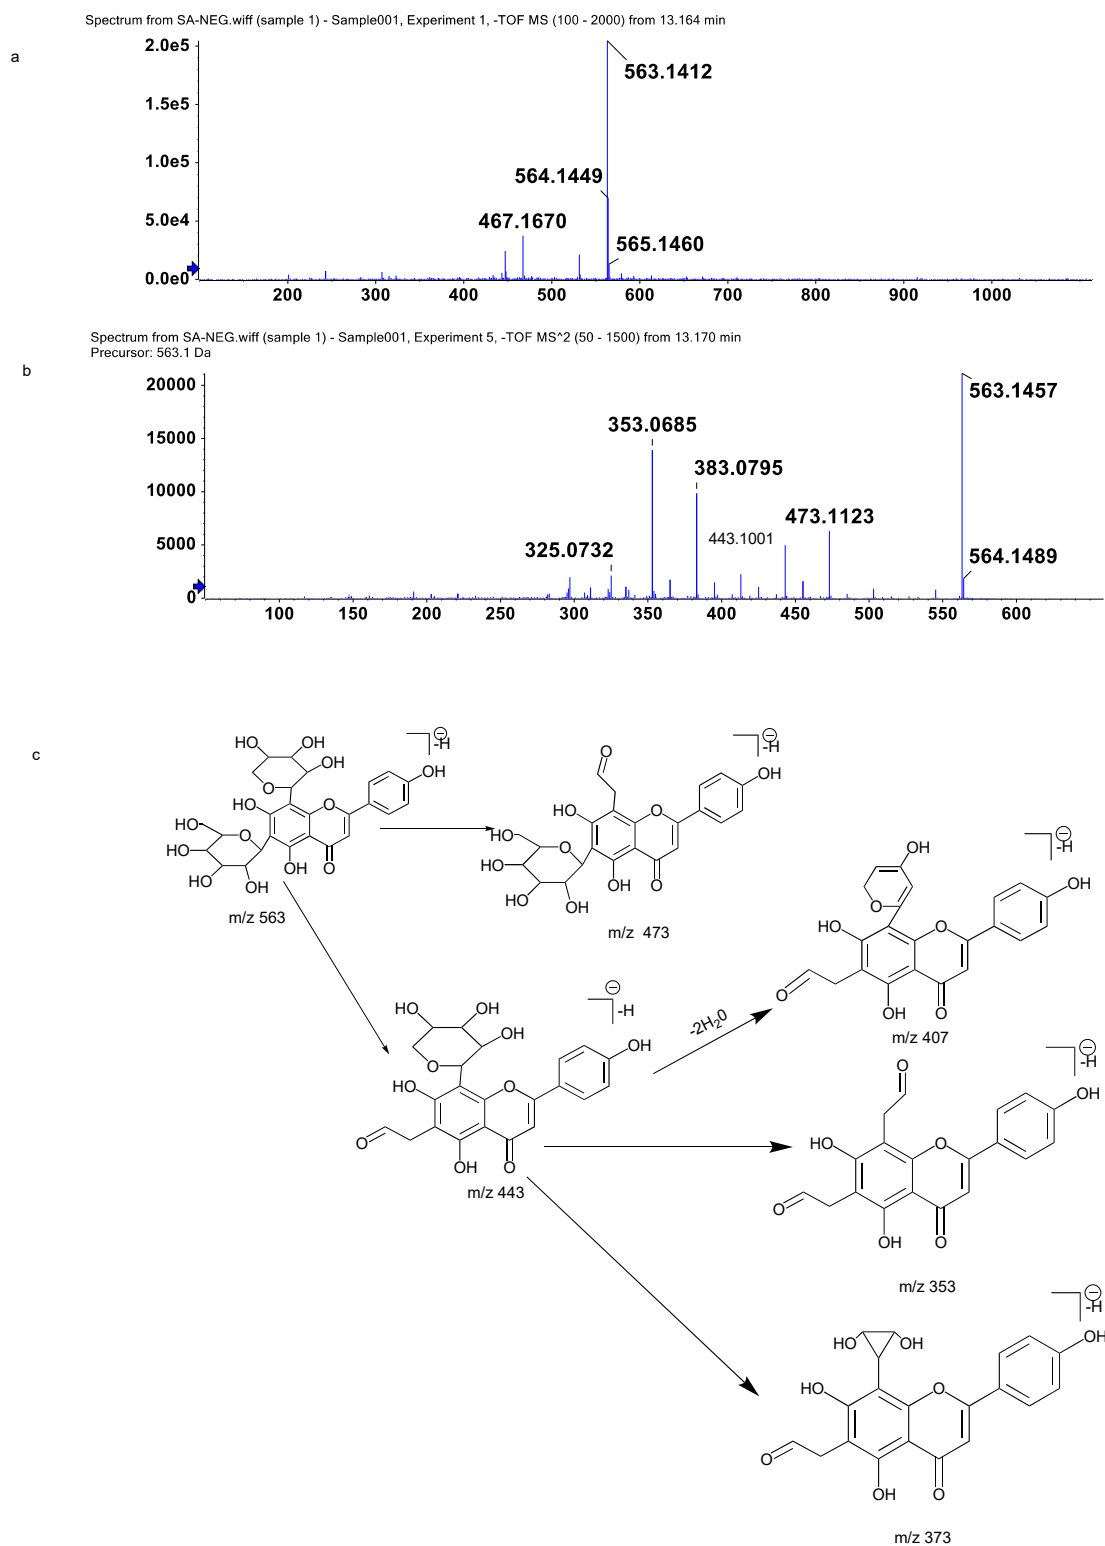

**Fig.S6.** The first order mass spectrometry (a), the secondary mass spectrometry (b) and the cleavage pathway (c) of compound 6.

Spectrum from SA-NEG.wiff (sample 1) - Sample001, Experiment 1, -TOF MS (100 - 2000) from 14.018 min

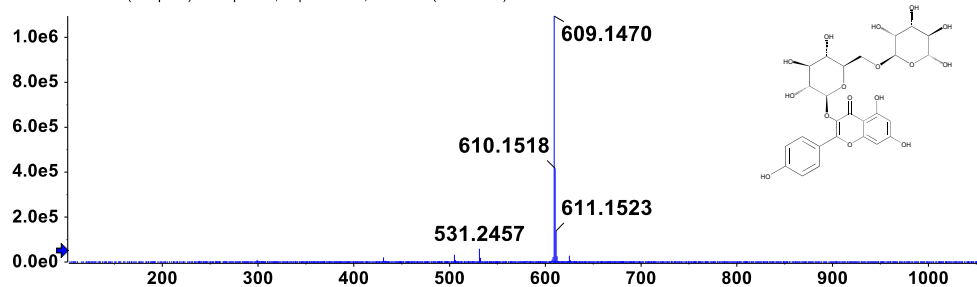

Spectrum from SA-NEG.wiff (sample 1) - Sample001, Experiment 3, -TOF MS<sup>2</sup> (50 - 1500) from 13.950 min  
Precursor: 609.1 Da

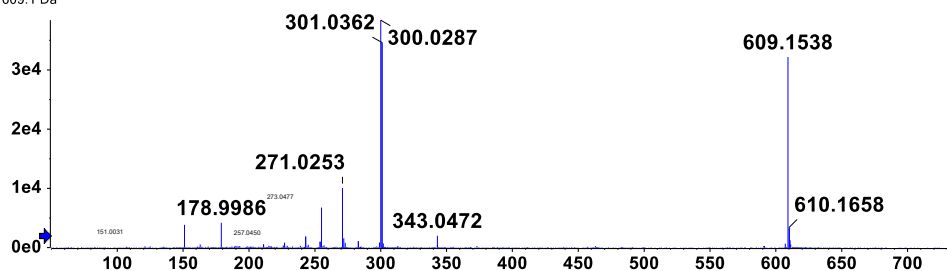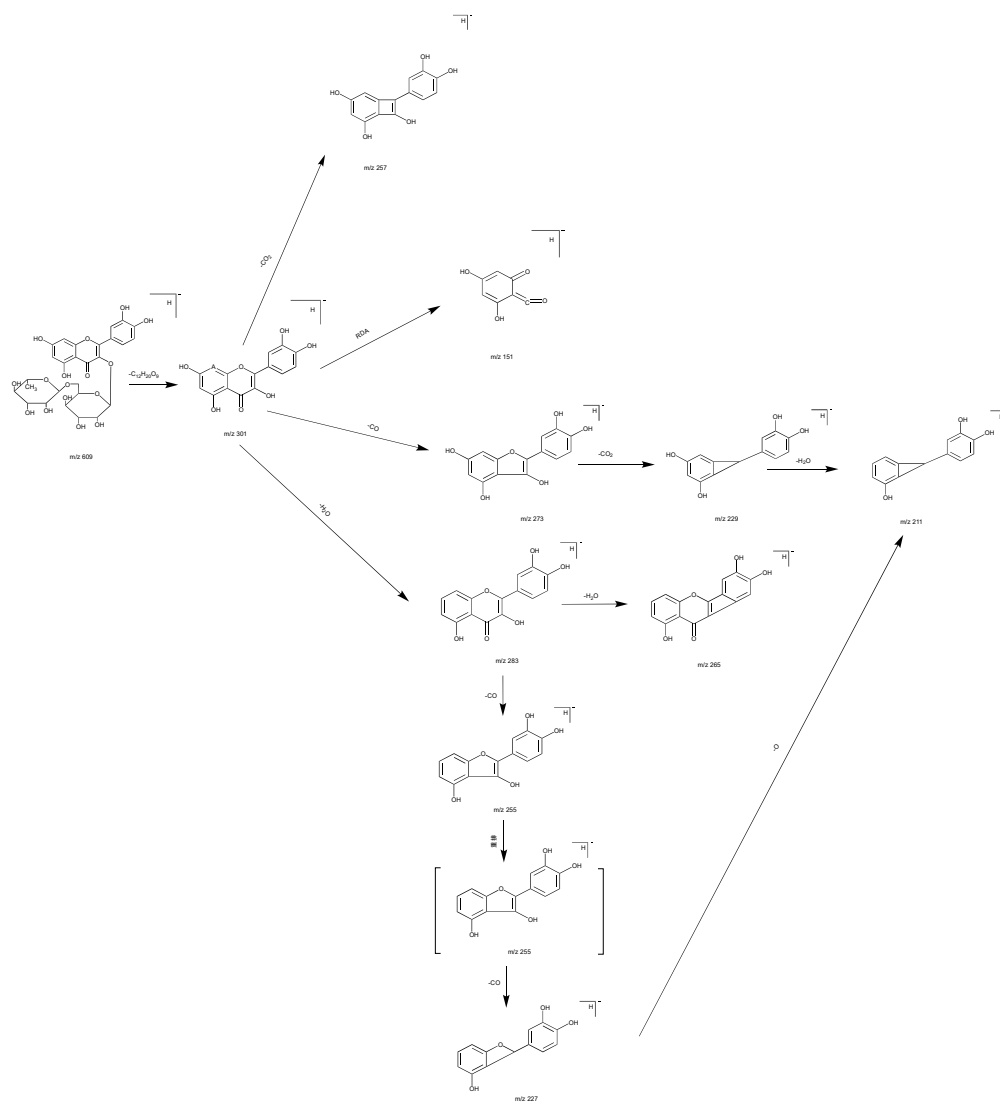

**Fig.S7.** The first order mass spectrometry (a), the secondary mass spectrometry (b) and the cleavage pathway (c) of compound 7.



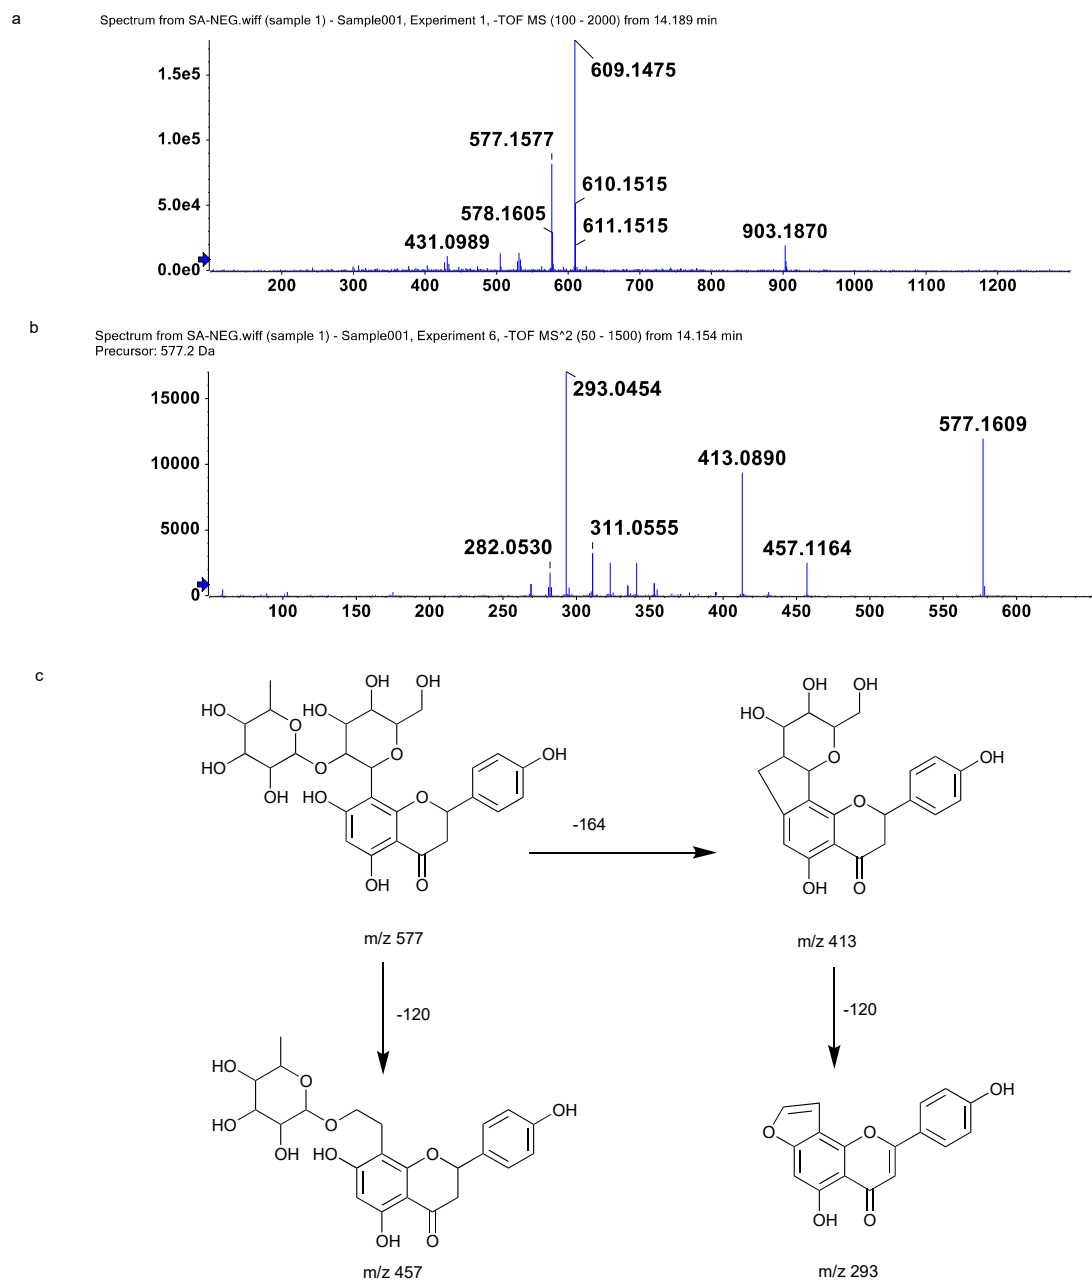

**Fig.S8.** The first order mass spectrometry (a), the secondary mass spectrometry (b) and the cleavage pathway (c) of compound 8.

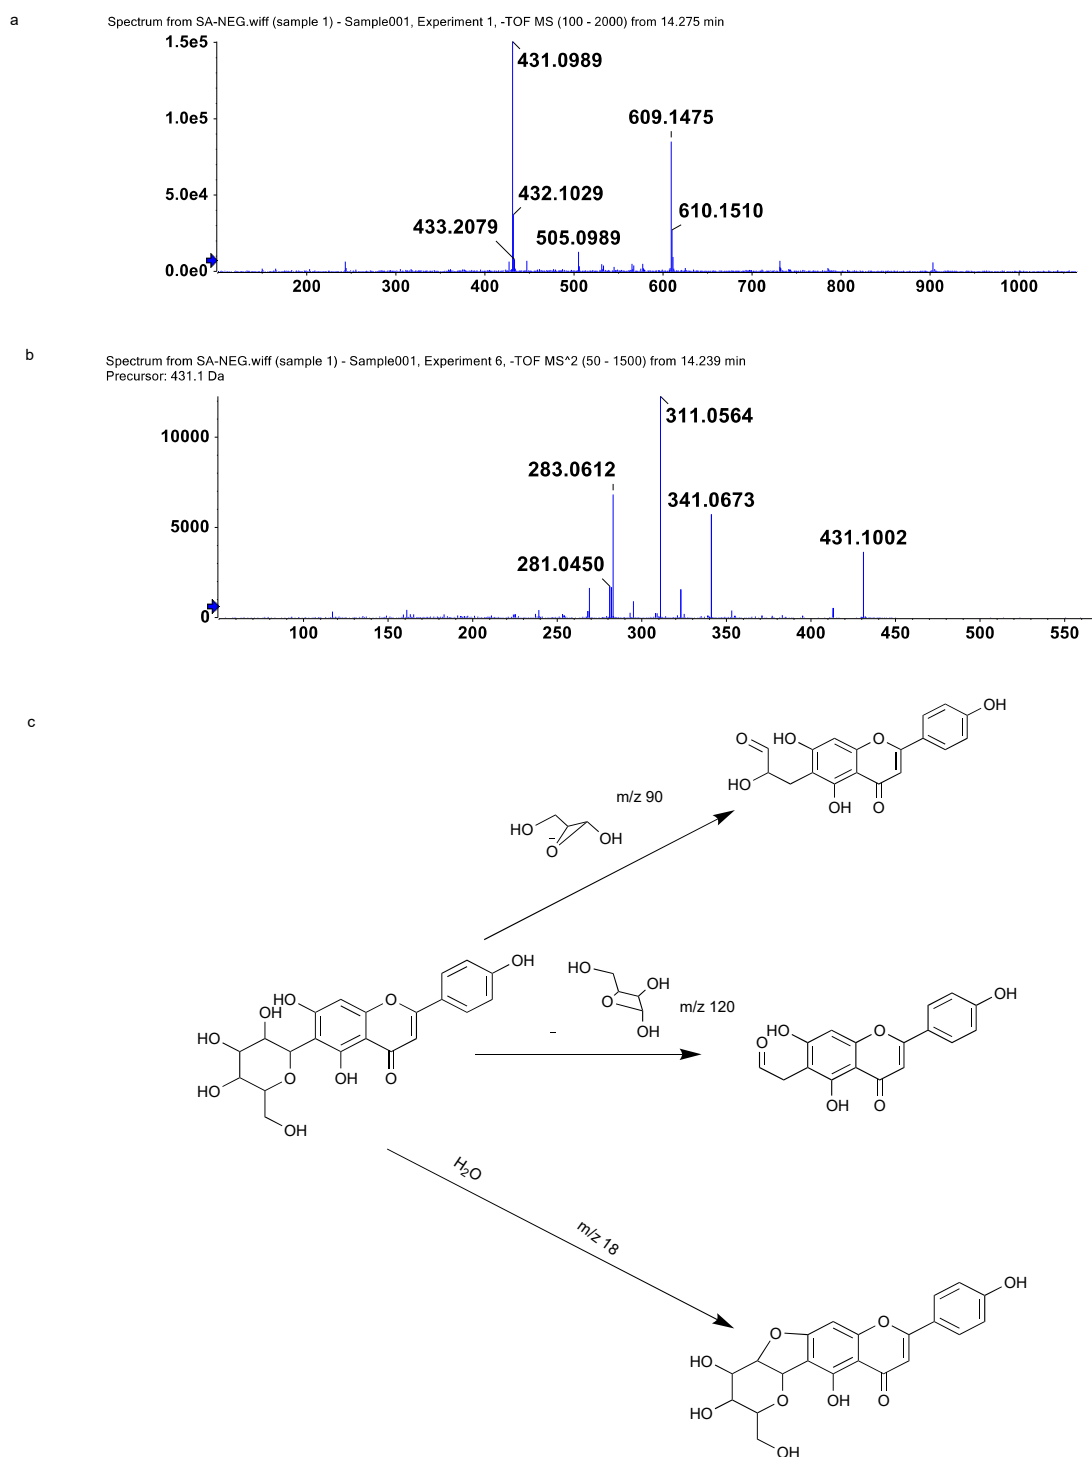

**Fig.S9.** The first order mass spectrometry (a), the secondary mass spectrometry (b) and the cleavage pathway (c) of compound 9.

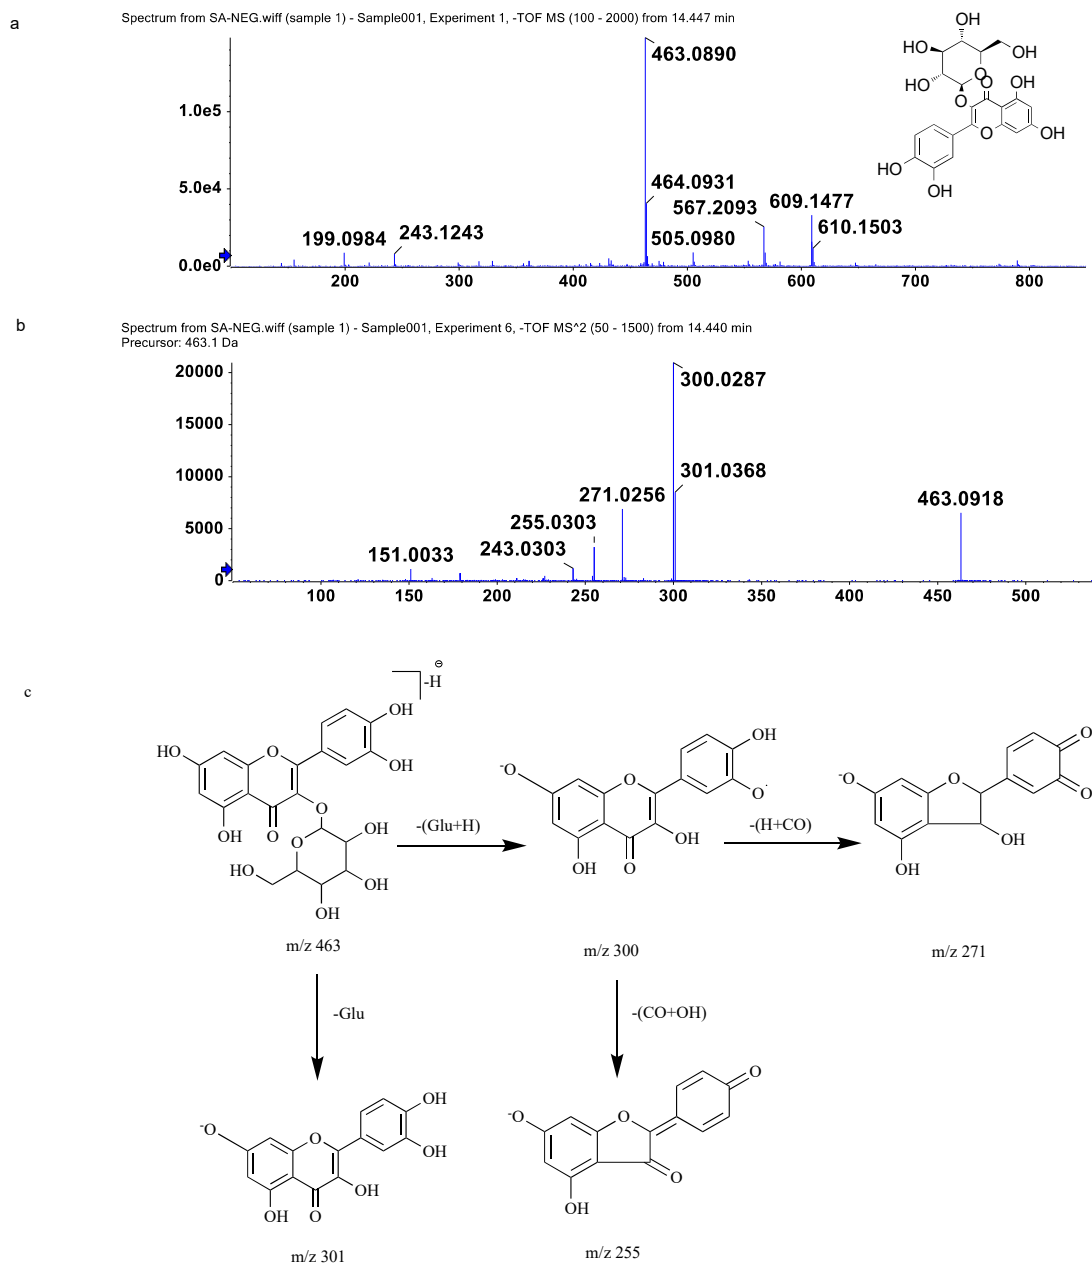

**Fig.S10.** The first order mass spectrometry (a), the secondary mass spectrometry (b) and the cleavage pathway (c) of compound 10.

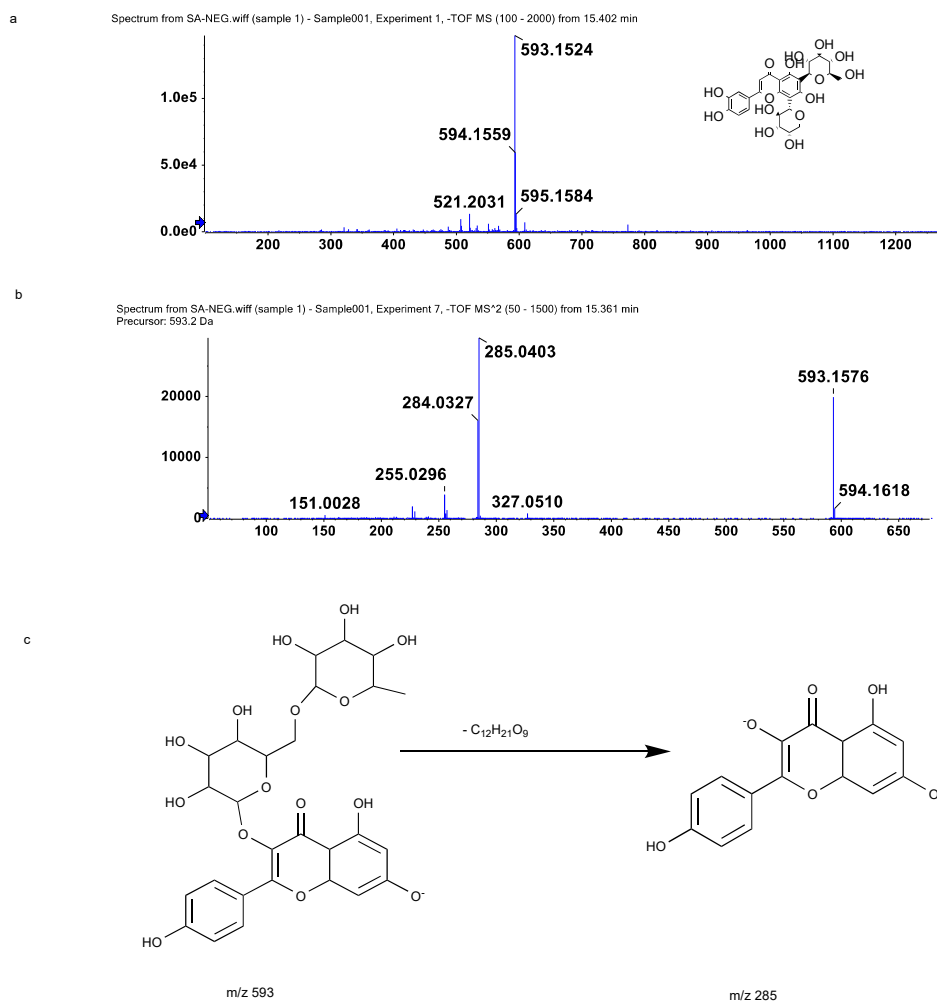

**Fig.S11.** The first order mass spectrometry (a), the secondary mass spectrometry (b) and the cleavage pathway (c) of compound 11.
